# Supplementary material for: Reasons for non-participation in malformation scans in Denmark: a cohort study
Source: Springer Nature journal article supplement (doi:10.1186/s12884-018-1877-z), 2018-06-13

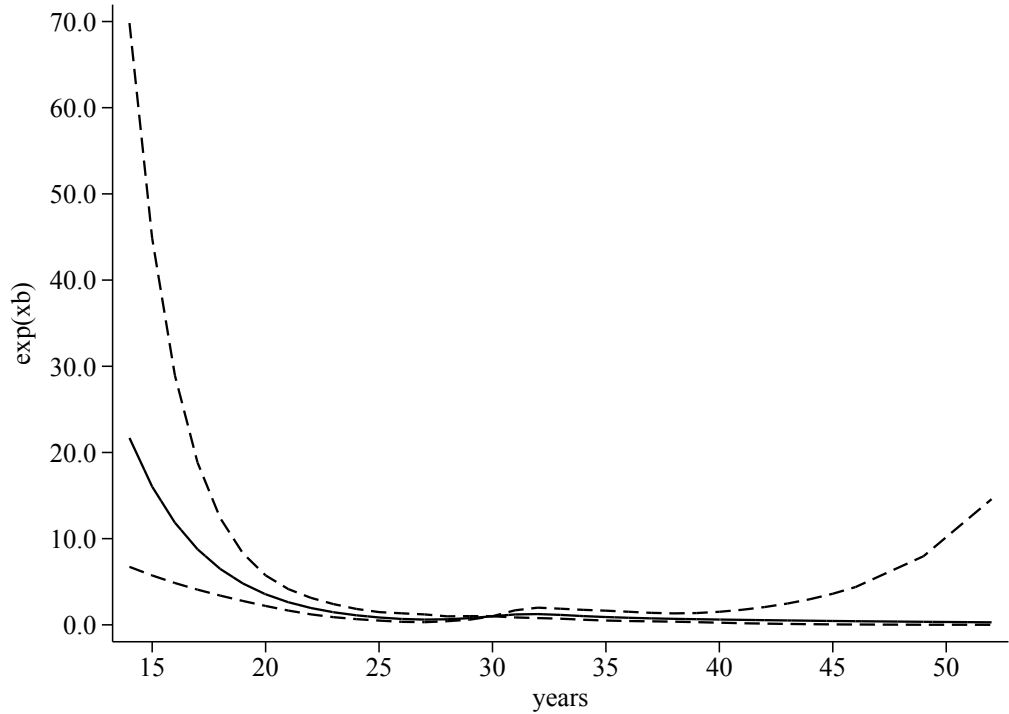

Supplement: MOESM1 [file 15845964]
